# Supplementary material for: Can I go home now? The safety and efficacy of a new UK paediatric febrile neutropenia protocol for risk-stratified early discharge on oral antibiotics
Source: PubMed Central journal article supplement — Arch Dis Child. 2022 Dec 12;108(3):192–7. doi: 10.1136/archdischild-2021-323254 (PMC9985710; doi:10.1136/archdischild-2021-323254), 2022-12-12
Supplement: archdischild-2021-323254supp001.pdf [file archdischild-2021-323254supp001.pdf]

## Supplementary Materials

### Supplementary Table 1 - reason for review

Reasons for medical review include:

- Ongoing fever (>72 hours from presentation) or new fever after being afebrile for 24 hours
- Feeling unwell/new symptoms and signs
- Parental concern
- Significant decrease in oral intake or significant increase in output (vomiting and diarrhoea)
- Positive blood culture or new infection identified after transfer home
- Severe or persistent pain
- Chills/rigor/shaking
- Not afebrile by day 5 of home-based care

Reasons for re-admission include:

- Fever > 38°C beyond 5 days from the start of the febrile neutropenic episode
- Clinically unwell / unstable
- Infection requiring in-patient care

### Supplementary Table 2 - Criteria for stopping service evaluation

| <b>RED CRITERIA:<br/>IMMEDIATE DISCONTINUATION AND<br/>REVERTING TO ORIGINAL POLICY</b>                                                               | <b>AMBER CRITERIA:<br/>MODIFICATION OF MINIMUM ADMISSION<br/>DURATIONS</b>                                                                                                                                                                                             |
|-------------------------------------------------------------------------------------------------------------------------------------------------------|------------------------------------------------------------------------------------------------------------------------------------------------------------------------------------------------------------------------------------------------------------------------|
| <ul style="list-style-type: none"> <li>• Avoidable death or ICU admission from bacterial sepsis in a 0/1 score group discharged before 36h</li> </ul> | <ul style="list-style-type: none"> <li>• High numbers of re-admissions (&gt;90%ile expected) in the 0/1 score group discharged before 36h: expected value 15%</li> <li>• High numbers of re-presentations within the first 24h after presentation (&gt;50%)</li> </ul> |

**Supplementary Table 3 - Diagnosis at first recorded episode**

| <b>Diagnosis at 1st recorded episode</b>              | <b>n</b> | <b>% total</b> |
|-------------------------------------------------------|----------|----------------|
| Acute lymphoblastic leukaemia                         | 169      | 41.7%          |
| Acute myeloid leukaemia                               | 33       | 8.1%           |
| Brain/Central Nervous System tumour                   | 34       | 8.4%           |
| Ewing's sarcoma                                       | 21       | 5.2%           |
| Germ cell tumour                                      | 3        | 0.7%           |
| Hepatoblastoma                                        | 5        | 1.3%           |
| High risk neuroblastoma                               | 15       | 3.7%           |
| Low/intermediate risk neuroblastoma                   | 1        | 0.2%           |
| Lymphoma                                              | 25       | 6.2%           |
| Osteosarcoma                                          | 17       | 4.2%           |
| Other                                                 | 24       | 5.9%           |
| Other sarcoma                                         | 4        | 1.0%           |
| Post haematopoietic stem cell transplant (allogeneic) | 22       | 5.4%           |
| Post haematopoietic stem cell transplant (autologous) | 2        | 0.5%           |
| Renal tumour                                          | 14       | 3.5%           |
| Retinoblastoma                                        | 2        | 0.5%           |
| Rhabdomyosarcoma                                      | 14       | 3.5%           |

**Supplementary Table 4 Diagnoses for each episode by centre**

|                      | PTC 1<br>n=123 | PTC 2<br>n=203 | PTC 3<br>n=46 | PTC 4<br>n=157 | PTC 5<br>n=77 | POSCU 1<br>n=7 | POSCU 2<br>n=20 | POSCU 3<br>n=3 | POSCU 4<br>n=9 | POSCU 5<br>n=25 | POSCU 6<br>n=23 | POSCU 7<br>n=17 | POSCU 8<br>n=19 |
|----------------------|----------------|----------------|---------------|----------------|---------------|----------------|-----------------|----------------|----------------|-----------------|-----------------|-----------------|-----------------|
| ALL                  | 31%            | 38%            | 46%           | 44%            | 10%           | 43%            | 20%             | 0%             | 67%            | 24%             | 74%             | 71%             | 79%             |
| AML                  | 18%            | 6%             | 11%           | 6%             | 39%           | 14%            | 15%             | 0%             | 0%             | 8%              | 4%              | 0%              | 0%              |
| Brain/CNS tumour     | 7%             | 12%            | 11%           | 6%             | 0%            | 29%            | 15%             | 0%             | 0%             | 16%             | 9%              | 0%              | 5%              |
| Lymphoma             | 11%            | 7%             | 7%            | 6%             | 10%           | 0%             | 0%              | 67%            | 0%             | 0%              | 0%              | 0%              | 0%              |
| Non-CNS solid tumour | 28%            | 21%            | 20%           | 29%            | 22%           | 14%            | 45%             | 0%             | 11%            | 36%             | 0%              | 29%             | 11%             |
| Other                | 5%             | 7%             | 7%            | 8%             | 1%            | 0%             | 5%              | 33%            | 11%            | 0%              | 0%              | 0%              | 5%              |
| Post HSCT            | 0%             | 8%             | 0%            | 1%             | 17%           | 0%             | 0%              | 0%             | 11%            | 16%             | 13%             | 0%              | 0%              |

**Supplementary Table 5 AUS score distribution by centre**

|           | PTC 1<br>n=123 | PTC 2<br>n=203 | PTC 3<br>n=46 | PTC 4<br>n=157 | PTC 5<br>n=77 | POSCU 1<br>n=7 | POSCU 2<br>n=20 | POSCU 3<br>n=3 | POSCU 4<br>n=9 | POSCU 5<br>n=25 | POSCU 6<br>n=23 | POSCU 7<br>n=17 | POSCU 8<br>n=19 |
|-----------|----------------|----------------|---------------|----------------|---------------|----------------|-----------------|----------------|----------------|-----------------|-----------------|-----------------|-----------------|
| AUS score |                |                |               |                |               |                |                 |                |                |                 |                 |                 |                 |
| 0         | 5%             | 8%             | 15%           | 13%            | 1%            | 71%            | 10%             | 33%            | 33%            | 0%              | 9%              | 18%             | 26%             |
| 1         | 31%            | 38%            | 26%           | 38%            | 14%           | 14%            | 10%             | 33%            | 44%            | 16%             | 57%             | 24%             | 16%             |
| 2         | 39%            | 31%            | 28%           | 29%            | 45%           | 0%             | 30%             | 0%             | 11%            | 64%             | 17%             | 24%             | 37%             |
| 3         | 25%            | 22%            | 30%           | 20%            | 39%           | 14%            | 50%             | 33%            | 11%            | 20%             | 17%             | 35%             | 21%             |

**Supplementary Table 6 - Outcomes of representations**

|                                | Homecare eligible:<br>No (N = 43) | Homecare eligible:<br>Yes (N = 21) |
|--------------------------------|-----------------------------------|------------------------------------|
| Time to representation (hours) |                                   |                                    |
| Median (IQR)                   | 120 (72, 144)                     | 96 (72, 120)                       |
| Reason for representation      |                                   |                                    |
| Positive blood culture         | 4 (9%)                            | 5 (24%)                            |

|                                                |          |         |
|------------------------------------------------|----------|---------|
| New symptoms                                   | 27 (63%) | 8 (38%) |
| Persistent symptoms                            | 11 (26%) | 8 (38%) |
| Outcomes                                       |          |         |
| Significant infection requiring IV antibiotics | 10 (23%) | 6 (29%) |
| ICU admission                                  | 0 (0%)   | 0 (0%)  |
| Death from infection                           | 0 (0%)   | 0 (0%)  |
| Death from other cause                         | 0 (0%)   | 0 (0%)  |

**Supplementary Table 7 - Organisms isolated in bloods cultures**

| <b>Organism</b>           | <b>n</b> | <b>% total</b> |
|---------------------------|----------|----------------|
| Abiotrophia defectiva     | 1        | 0.5%           |
| Acinetobacter spp         | 3        | 1.6%           |
| Bacillus spp              | 3        | 1.6%           |
| Campylobacter             | 2        | 1.1%           |
| Candida albicans          | 1        | 0.5%           |
| Citrobacter spp           | 2        | 1.1%           |
| CoNS                      | 48       | 25.3%          |
| Diphtheroids spp          | 1        | 0.5%           |
| Enterobacter cloacae      | 7        | 3.7%           |
| Enterococcus spp          | 9        | 4.7%           |
| Escherichia coli          | 21       | 11.1%          |
| Fusobacterium spp         | 4        | 2.1%           |
| Klebsiella spp            | 10       | 5.3%           |
| Kocuria spp               | 3        | 1.6%           |
| Micrococcus spp           | 5        | 2.6%           |
| Moraxella spp             | 3        | 1.6%           |
| MRSA                      | 1        | 0.5%           |
| MSSA                      | 11       | 5.8%           |
| mycobacterium mucogenicum | 2        | 1.1%           |
| Neisseria Cinerea         | 1        | 0.5%           |
| NOS                       | 8        | 4.2%           |
| other                     | 1        | 0.5%           |
| Pantoea septica           | 1        | 0.5%           |

|                       |    |       |
|-----------------------|----|-------|
| Pseudomonas spp       | 11 | 5.8%  |
| Rhizobium radiobacter | 1  | 0.5%  |
| Rothia Mucilaginosa   | 2  | 1.1%  |
| Serratia spp          | 2  | 1.1%  |
| Stenotrophomonas      | 1  | 0.5%  |
| Strep pneumoniae      | 1  | 0.5%  |
| Streptococcus spp     | 2  | 1.1%  |
| VGS                   | 22 | 11.6% |

### Supplementary table 8

#### Core outcomes for randomly selected unique episodes, one per patient

Number of episodes submitted: 405

Initial presentations where homecare criteria met 87 (21%)

#### Core outcome data

|                                                | AUS: 0 (N = 54)  | AUS: 1 (N = 131)  | AUS: 2 (N = 127)   | AUS: 3 (N = 93)   |
|------------------------------------------------|------------------|-------------------|--------------------|-------------------|
| <b>Duration of IV antibiotics (Days)</b>       |                  |                   |                    |                   |
| n;Median (IQR)                                 | 53; 3 (1, 4)     | 117; 3 (2, 6)     | 112; 5 (3, 9)      | 83; 6 (3, 10)     |
| n;Duration of admission (hrs)                  | 53; 72 (28, 216) | 128; 96 (48, 192) | 125; 144 (72, 240) | 90; 168 (72, 330) |
| <b>Outcomes</b>                                |                  |                   |                    |                   |
| Positive blood culture (excl contaminants)     | 10 (19%)         | 18/130 (14%)      | 26 (20%)           | 34 (37%)          |
| Significant infection requiring IV antibiotics | 12 (22%)         | 15/130 (12%)      | 33 (26%)           | 31 (33%)          |
| Representation within 7 days                   | 3 (6%)           | 10 (8%)           | 7 (6%)             | 10 (11%)          |
| Readmission within 7 days                      | 3 (6%)           | 8 (6%)            | 7 (6%)             | 9 (10%)           |
| ICU admission                                  | 0 (0%)           | 2/130 (2%)        | 4 (3%)             | 3 (3%)            |
| Death from infection                           | 0 (0%)           | 0/130 (0%)        | 0 (0%)             | 1 (1%)            |
| Death from other cause                         | 0 (0%)           | 0/130 (0%)        | 1 (1%)             | 0 (0%)            |

## Initial presentations meeting homecare criteria

|                                            | AUS: 0 (N = 21) | AUS: 1 (N = 34) | AUS: 2 (N = 18) | AUS: 3 (N = 14) |
|--------------------------------------------|-----------------|-----------------|-----------------|-----------------|
| <b>Duration of admission (hrs)</b>         |                 |                 |                 |                 |
| n;Median (IQR)                             | 20; 26 (16, 39) | 34; 30 (18, 68) | 18; 58 (37, 72) | 13; 68 (48, 96) |
| <b>Outcomes</b>                            |                 |                 |                 |                 |
| Positive blood culture (excl contaminants) | 1 (5%)          | 2 (6%)          | 1 (6%)          | 0 (0%)          |
| Representation within 7 days               | 1 (5%)          | 6 (18%)         | 2 (11%)         | 1 (7%)          |
| Readmission within 7 days                  | 1 (5%)          | 4 (12%)         | 2 (11%)         | 1 (7%)          |

**Percentage of AUS 0-1 readmitted**

9%

**Binomial test for significance of readmission in AUS 0-1 different to expected (15%)**

p= 0.261

Supplementary Figure 1 - Episodes per centre over time.

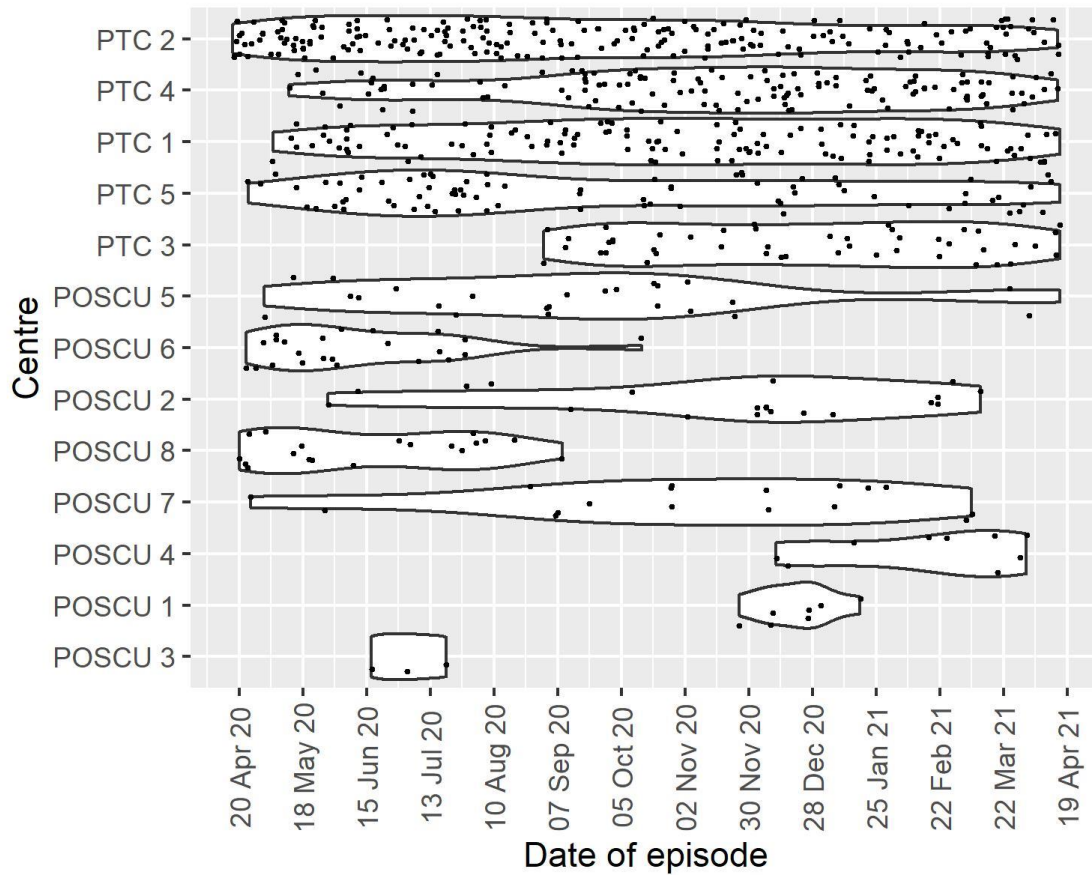

Each point represents an episode and violins are smoothed density estimates. PTC = principal treatment centre, POSCU = paediatric oncology shared care unit



**Supplementary Figure 2 - Proportion of initial episodes eligible for homecare by centre.**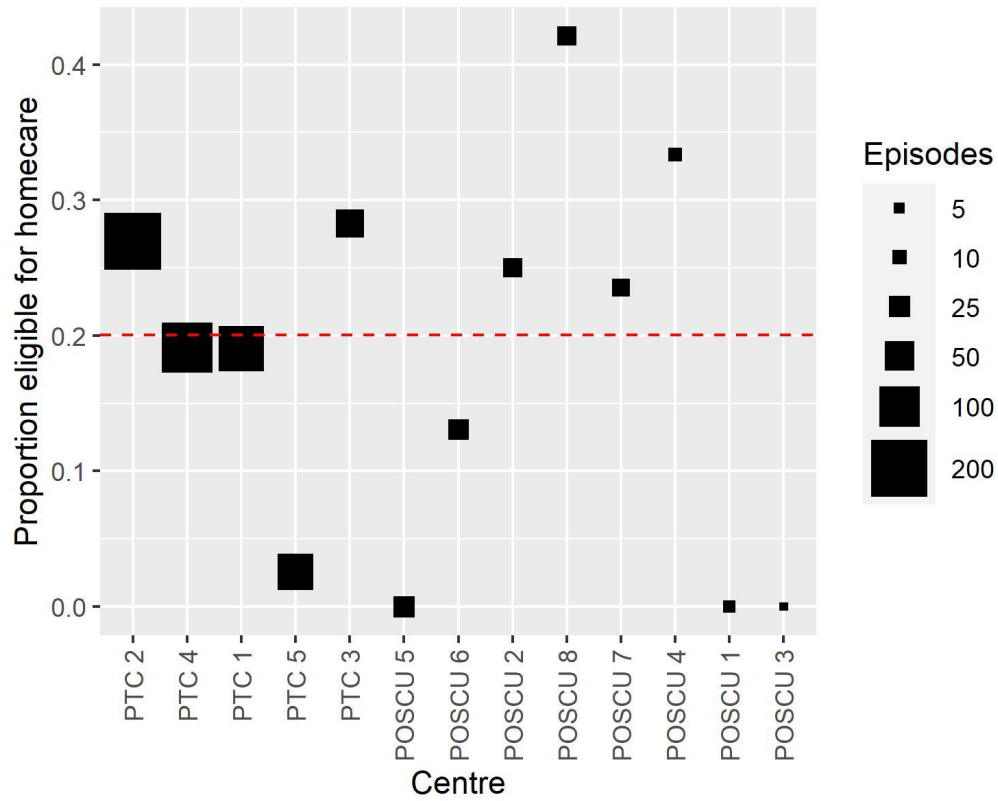

Area of each square is proportional to the number of episodes submitted by the centre. Dotted red line represents proportion of all episodes

**Supplementary File 1 – data collection tool****CCLG Febrile Neutropenia Survey 2020**

---

**Start of Block: Default Question Block**

Q2 In light of the current coronavirus pandemic and the resultant pressures put on our services the supportive care group has produced new guidance over management of one of our most common reasons for admission.

It is clearly important that there is a mechanism to evaluate such a major change to current practice and even more so to ensure this is carried out in order to ensure patient safety This form takes around 2 minutes to complete per patient.

Please include **every** patient with febrile neutropenia (regardless of management followed). Please input data at discharge or 7 days, whichever is sooner. If a patient re-presents within 7 days, please complete the form again, with the re-presentation questions only. (Don't worry ... the analysis will supersede original outcome data and won't double-count.)

The cumulative data will be analysed on a weekly basis and used to evaluate the protocol at a national level. Please ensure you input patients as soon as possible.

This protocol and evaluation have been adapted from the paediatric low-risk FN program developed by Gabrielle Haeusler, National Centre for Infections in Cancer, Australia and in collaboration with Bob Phillips and Jess Morgan, University of York, and the CCLG team including Sujith Samarasinghe, Barry Pizer, Richard Grundy and Jessica Bate.

---

**End of Block: Default Question Block**

---

**Start of Block: General information**

Q1 Centre name (If you are answering from a POSCU please click Other)

▼ PTC(1) ... Other (21)

---

**Display This Question:**

*If Centre name (If you are answering from a POSCU please click Other) = Other*

Q16 Centre name (Don't worry about the full name – e.g. North Staffs rather than “North Staffordshire Hospital NHS Trust” is fine)

---

Q3 Unique case identifier (You may have your own, or perhaps use two initials plus day of birth: I'm RP07 for example)

---

---

Q15 Is this a unique episode or a representation within 7 days (please log both incidents separately)?

- Unique episode (1)
- Representation with 7 days (2)

End of Block: General information

---

Start of Block: Underlying diagnosis

Display This Question:

*If Is this a unique episode or a representation within 7 days (please log both incidents separately)? = Unique episode*

Q4 Patients underlying diagnosis

▼ ALL (1) ... Other (16)

---

Display This Question:

*If Patients underlying diagnosis = Other*

Q5 Underlying diagnosis:

---

End of Block: Underlying diagnosis

---

Start of Block: Block 2

Display This Question:

*If Is this a unique episode or a representation within 7 days (please log both incidents separately)? = Unique episode*

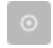

Q6 Date of febrile neutropenia episode

---

Display This Question:

*If Is this a unique episode or a representation within 7 days (please log both incidents separately)? = Unique episode*

Q7 AUS risk stratification score:

|                                                                | Yes (1)               | No (2)                |
|----------------------------------------------------------------|-----------------------|-----------------------|
| Preceding chemotherapy more intensive than ALL maintenance (1) | <input type="radio"/> | <input type="radio"/> |
| White cell count (2)                                           | <input type="radio"/> | <input type="radio"/> |
| Platelets (3)                                                  | <input type="radio"/> | <input type="radio"/> |

Display This Question:

*If Is this a unique episode or a representation within 7 days (please log both incidents separately)? = Unique episode*

Q8 Total score (sum of "yes" answers)

- 0 (1)
- 1 (2)
- 2 (3)
- 3 (4)

End of Block: Block 2

Start of Block: Block 7

Display This Question:

*If Is this a unique episode or a representation within 7 days (please log both incidents separately)? = Unique episode*

Q17 Did the patient meet the following criteria for early hospital discharge?

|                                                                                                                                                                                                                                                                                                                          | Yes (1)               | No (2)                |
|--------------------------------------------------------------------------------------------------------------------------------------------------------------------------------------------------------------------------------------------------------------------------------------------------------------------------|-----------------------|-----------------------|
| Leukaemia/lymphoma in remission or solid tumour stable/responding (1)                                                                                                                                                                                                                                                    | <input type="radio"/> | <input type="radio"/> |
| Low risk disease group: NOT ANY OF acute lymphoblastic leukaemia (ALL) induction, or acute infant leukaemias, acute myeloid leukaemia (AML), post allogeneic haematopoietic stem cell transplant (HSCT) within 3 months or still on immunosuppression, congenital immunodeficiency, aplastic anaemia, Down Syndrome. (2) | <input type="radio"/> | <input type="radio"/> |
| No confirmed focus of infection requiring hospital care (including but not limited to central line infection, perianal cellulitis, pneumonia) (3)                                                                                                                                                                        | <input type="radio"/> | <input type="radio"/> |
| No medical complication requiring inpatient care (including, but not limited to, pain requiring intravenous analgesia, poor oral intake or excessive loss requiring intravenous hydration; respiratory distress or oxygen requirement) (4)                                                                               | <input type="radio"/> | <input type="radio"/> |
| No severe sepsis or septic shock at presentation (5)                                                                                                                                                                                                                                                                     | <input type="radio"/> | <input type="radio"/> |

Display This Question:

*If Is this a unique episode or a representation within 7 days (please log both incidents separately)? = Unique episode*

Q18 Was there any other reason not to discharge the patient as per the protocol (eg parental concern, professional choice, previous non-compliance, social concerns, lack of adequate transport)?

---

End of Block: Block 7

---

Start of Block: Time to initial discharge

Display This Question:

*If Is this a unique episode or a representation within 7 days (please log both incidents separately)? = Unique episode*

Q9 Time from presentation to initial discharge (Please provide in hours if <72 hours, or days if >72hours)

\_\_\_\_\_ Hours (1)

\_\_\_\_\_ Days (2)

---

Q25 Duration of IV antibiotics (in days, 0=single dose, if longer than 14 please use "14")

0 1 2 3 4 5 6 7 8 9 10 11 12 13 14

|          |                                                                                      |
|----------|--------------------------------------------------------------------------------------|
| Days ( ) |  |
|----------|--------------------------------------------------------------------------------------|

End of Block: Time to initial discharge

---

Start of Block: Representation

Display This Question:

*If Is this a unique episode or a representation within 7 days (please log both incidents separately)? = Representation with 7 days*

Q19 How long after the initial assessment (not initial discharge), did re-presentation occur?

\_\_\_\_\_ hours (1)

\_\_\_\_\_ days (2)

---

*Display This Question:*

*If Is this a unique episode or a representation within 7 days (please log both incidents separately)? = Representation with 7 days*

Q23 What was the date of their re-presentation?

\_\_\_\_\_

---

*Display This Question:*

*If Is this a unique episode or a representation within 7 days (please log both incidents separately)? = Representation with 7 days*

Q22 Was the patient admitted to hospital following their re-presentation?

Yes (1)

No (2)

---

*Display This Question:*

*If Is this a unique episode or a representation within 7 days (please log both incidents separately)? = Representation with 7 days*

Q20 What was the main reason for re-presentation?

Persistence of original symptoms (1)

Development of new symptoms (2)

Requested by hospital due to positive blood culture (3)

Requested by hospital for other reason (4)

---

*Display This Question:*

*If What was the main reason for re-presentation? = Requested by hospital for other reason*

Q21 Why was the re-presentation requested by the hospital?

---

End of Block: Representation

---

Start of Block: Positive blood cultures

Q10 Did the patient have any positive blood cultures during this episode (excluding contaminants)?

- Yes (1)
- No (2)

*Display This Question:*

*If Did the patient have any positive blood cultures during this episode (excluding contaminants)? = Yes*

Q11 What organisms were found?

---

End of Block: Positive blood cultures

---

Start of Block: Significant outcomes



Q12 Did the patient experience any of the following outcomes (tick all that apply)?

|                                                                                                                  | Yes (1)               | No (2)                |
|------------------------------------------------------------------------------------------------------------------|-----------------------|-----------------------|
| Significant clinical infection requiring IV antibiotics (eg periorbital cellulitis, joint infection, CLABSI) (1) | <input type="radio"/> | <input type="radio"/> |
| ICU admission (2)                                                                                                | <input type="radio"/> | <input type="radio"/> |
| Death from infection (3)                                                                                         | <input type="radio"/> | <input type="radio"/> |
| Death from other reason (4)                                                                                      | <input type="radio"/> | <input type="radio"/> |

End of Block: Significant outcomes

---

Start of Block: Block 4

Q13 Any further comments about this patient's febrile neutropenia episode?

---

---

---

---

---

End of Block: Block 4

---

Start of Block: Block 5

Q14 Please provide your email address so that if we have any further questions about this febrile neutropenia episode, we can contact you. (We will not use your email address for any other purpose.)

---

End of Block: Block 5

---
